# Supplementary material
Source: publisher site journal article supplement (https://www.dovepress.com/article/415347)
Supplement: Supplementary file 1 [file get_supplementary_file.php]

**Search strategy：**

**We searched through the electronic databases PubMed using the following search terms: “liver abscess, hepatic abscess” and "Clostridium perfringens".** **The search field is “All Field”.** **The articles were searched from inception of the database until March 3, 2023.** **In addition, some non-open access articles were not included in the search results because they were not available.**
